# Supplementary material
Source: PubMed Central journal article supplement (PMC10323927)
Supplement: NIHMS1910664-supplement-Supplementary_Fig_1_and_Supplementary_Tables_1_and_2.pdf [file NIHMS1910664-supplement-Supplementary_Fig_1_and_Supplementary_Tables_1_and_2.pdf]

Supplementary Online Material

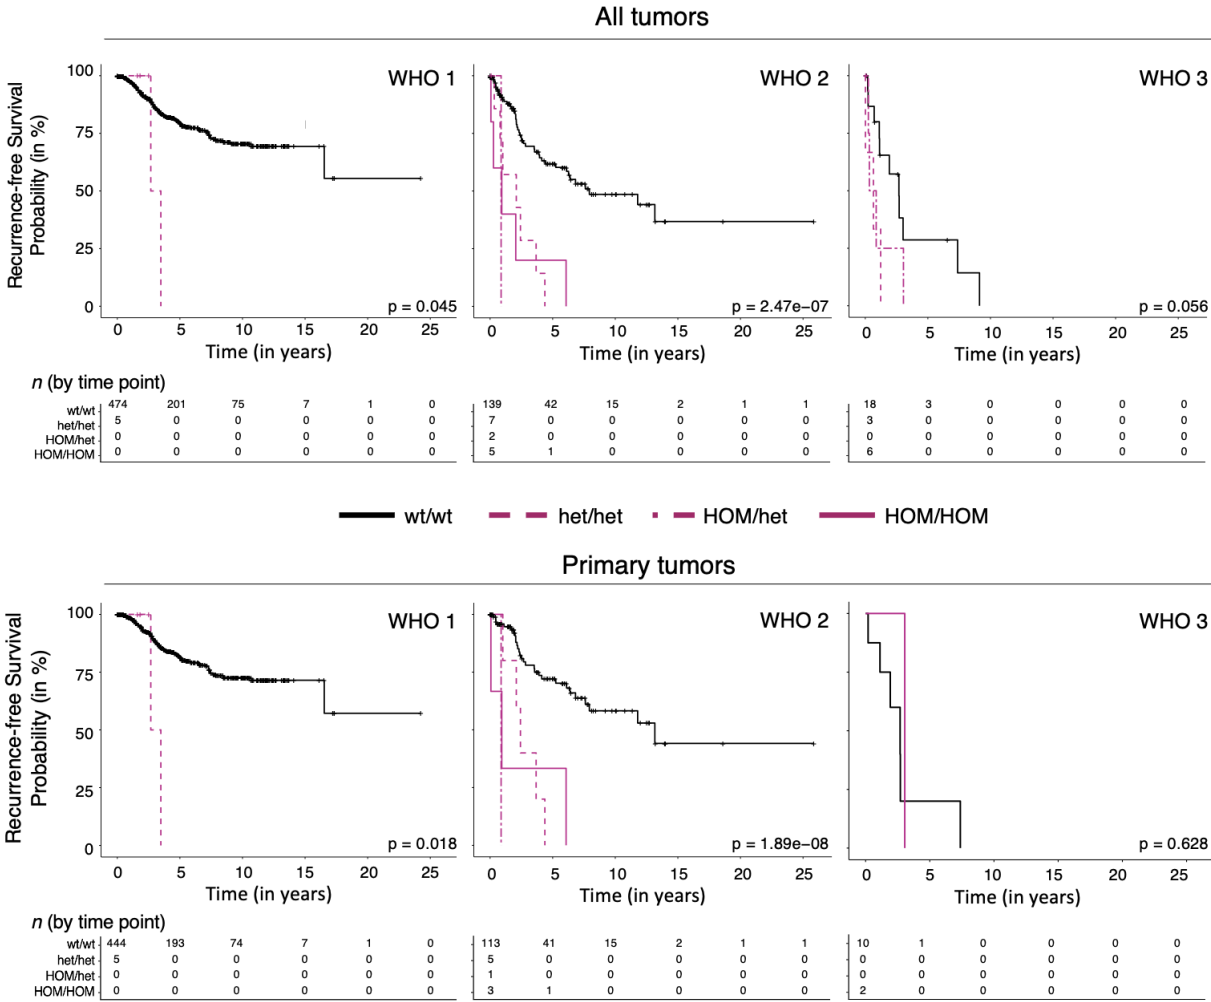

**Supplementary Figure 1.** Recurrence-free survival probability of all tumors (n=659, top) and of primary tumors (n=583, bottom) by WHO grade. Kruskal-Wallis ANOVA.

**Supplementary Table 1:** Clinical characteristics of tumors with CDKN2A/B losses, grouped by genotype. TERTp, TERT promoter mutation.

|                                                | Gender | Age     | Primary Tumor | Extent of Resection | Recurrence | RFS (mo) | WHO grade | MenG Group | TERTp Mutation |
|------------------------------------------------|--------|---------|---------------|---------------------|------------|----------|-----------|------------|----------------|
| CDKN2A/B homozygous / homozygous (HOM/HOM)     |        |         |               |                     |            |          |           |            |                |
| Tumor 1                                        | F      | 52.6    | No            | GTR                 | No         | 0.9      | 3         | C          | No             |
| Tumor 2                                        | F      | 51      | No            | STR                 | Yes        | 3.9      | 3         | C          | No             |
| Tumor 3                                        | F      | 52.6    | No            | STR                 | Yes        | 10.5     | 3         | C          | No             |
| Tumor 4                                        | F      | 60.4    | Yes           | STR                 | Yes        | 36.6     | 3         | C          | No             |
| Tumor 5                                        | M      | 68.9    | No            | GTR                 | Yes        | 3        | 3         | C          | No             |
| Tumor 6                                        | M      | 73.4    | Yes           | STR                 | No         | 0.6      | 3         | C          | NA             |
| Tumor 7                                        | F      | 70      | Yes           | GTR                 | Yes        | 72.9     | 2         | C          | No             |
| Tumor 8                                        | F      | 75      | No            | UNKN                | Yes        | 3.2      | 2         | C          | NA             |
| Tumor 9                                        | M      | 65      | Yes           | GTR                 | Yes        | 11.2     | 2         | C          | No             |
| Tumor 10                                       | M      | 65      | Yes           | STR                 | Yes        | 0.8      | 2         | C          | c.-124C>T      |
| Tumor 11                                       | M      | 74.3    | No            | STR                 | Yes        | 24.6     | 2         | C          | No             |
| CDKN2A/B homozygous / heterozygous (HOM/het)   |        |         |               |                     |            |          |           |            |                |
| Tumor 12                                       | F      | 62.7    | No            | STR                 | No         | 1.2      | 2         | C          | NA             |
| Tumor 13                                       | F      | 69      | Yes           | GTR                 | Yes        | 10.6     | 2         | C          | No             |
| CDKN2A/B heterozygous / heterozygous (het/het) |        |         |               |                     |            |          |           |            |                |
| Tumor 14                                       | F      | 75.9    | No            | UNKN                | Yes        | 14.8     | 3         | C          | c.-124C>T      |
| Tumor 15                                       | M      | 58.1    | No            | GTR                 | Yes        | 7.8      | 3         | C          | No             |
| Tumor 16                                       | M      | 74.1    | No            | GTR                 | Yes        | 0.1      | 3         | C          | No             |
| Tumor 17                                       | F      | 57      | No            | STR                 | Yes        | 9.6      | 2         | C          | No             |
| Tumor 18                                       | M      | 47.6    | Yes           | GTR                 | Yes        | 12.2     | 2         | C          | c.-57A>C       |
| Tumor 19                                       | M      | 43.3    | Yes           | GTR                 | Yes        | 52.5     | 2         | C          | No             |
| Tumor 20                                       | M      | 54.3    | Yes           | GTR                 | Yes        | 29.1     | 2         | C          | No             |
| Tumor 21                                       | M      | 59      | Yes           | GTR                 | Yes        | 25.1     | 2         | C          | No             |
| Tumor 22                                       | M      | 68.1    | No            | STR                 | Yes        | 4        | 2         | C          | NA             |
| Tumor 23                                       | M      | Unknown | Yes           | STR                 | Yes        | 44.1     | 2         | C          | No             |
| Tumor 24                                       | F      | 48.4    | Yes           | STR                 | Yes        | 41.7     | 1         | C          | No             |
| Tumor 25                                       | F      | 58      | Yes           | GTR                 | No         | 19.3     | 1         | C          | No             |
| Tumor 26                                       | F      | 62      | Yes           | GTR                 | No         | 30       | 1         | A          | No             |
| Tumor 27                                       | M      | 70      | Yes           | GTR                 | No         | 21.9     | 1         | C          | No             |
| Tumor 28                                       | M      | 80.4    | Yes           | GTR                 | Yes        | 32.1     | 1         | C          | c.-59T>G       |

**Supplementary Table 2.** Ratio of CDKN2A/B-altered meningioma to CDKN2A/B wildtype tumors (n=695). MIB, mitotic index. Statistical test, Fisher's Exact Test. \*Due to unknown MIB scores for some tumors, the total tumor count for wildtype is 307 and CDKN2A/B altered is 16.

|                         | CDKN2A/B status |            |          |
|-------------------------|-----------------|------------|----------|
| <b>MIB*</b>             | WT              | altered    | p-Value  |
| Median                  | 3.8             | 12.5       | 5.13E-03 |
| <b>Tumor Type</b>       | WT              | altered    | p-Value  |
| Primary                 | 567 (97.3%)     | 16 (2.7%)  | 1.60E-05 |
| Recurrence              | 64 (84.2%)      | 12 (15.8%) |          |
| <b>Recurrence</b>       | WT              | altered    | p-Value  |
| No                      | 485 (98.8%)     | 6 (1.2%)   | 2.51E-09 |
| Yes                     | 146 (86.9%)     | 22 (13.1%) |          |
| <b>WHO Grade (2016)</b> | WT              | altered    | p-Value  |
| 1                       | 474 (99.0%)     | 5 (1.0%)   | 1.14E-11 |
| 2                       | 139 (90.8%)     | 14 (9.2%)  |          |
| 3                       | 18 (66.7%)      | 9 (33.3%)  |          |
| <b>Molecular Group</b>  | WT              | altered    | p-Value  |
| MenG A                  | 258 (99.6%)     | 1 (0.4%)   | 3.07E-12 |
| MenG B                  | 173 (100.0%)    | 0 (0.0%)   |          |
| MenG C                  | 198 (88.0%)     | 27 (12.0%) |          |
| Unknown                 | 2 (100.0%)      | 0 (0.0%)   |          |
